# Supplementary material for: Infrastructure Change Is Not Enough: An Evaluation of SAMHSA’s Mental Health Transformation State Incentive Grants
Source: Atypon-hosted journal article supplement (doi:10.1176/appi.ps.201300324), 2014-07-01
Supplement: 947_ds001.pdf [file 947_ds001.pdf]

Online Supplement 2: Simplified MHTSIG Program Logic Model. + = positive correlation.

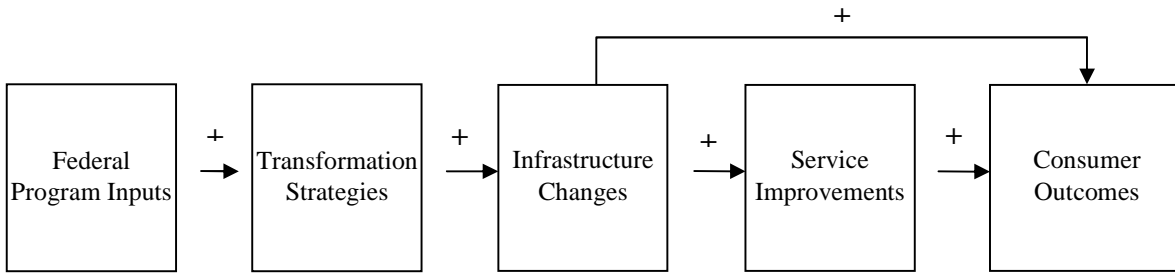

## Online Supplement 3: Examples of Infrastructure Change, Incremental Infrastructure Change, and Supporting Entries (Entries edited for length)

| Period                                                                                                    | Entry Title                                                                                                                     | Referent                                                                                                                                            | Standard of Completion                                                                                                                                                                                                           | Entry Result                                              |
|-----------------------------------------------------------------------------------------------------------|---------------------------------------------------------------------------------------------------------------------------------|-----------------------------------------------------------------------------------------------------------------------------------------------------|----------------------------------------------------------------------------------------------------------------------------------------------------------------------------------------------------------------------------------|-----------------------------------------------------------|
| Infrastructure Change:                                                                                    |                                                                                                                                 |                                                                                                                                                     |                                                                                                                                                                                                                                  |                                                           |
| 10/2007-<br>5/2008                                                                                        | An Act Concerning the Money Follows the Person Project                                                                          | This bill increases (from 700 to 5,000) the number of individuals who can be served under the Money Follows the Person (MFP) Demonstration program. | Legislation passed                                                                                                                                                                                                               | Completed: 5/8/2008<br>Impact: 1 policy change            |
| Incremental Infrastructure Change:                                                                        |                                                                                                                                 |                                                                                                                                                     |                                                                                                                                                                                                                                  |                                                           |
| 3/2008-<br>9/2008                                                                                         | (B1-3.b) Increase collaboration and training opportunities among behavioral health, physical health, and aging systems of care. | Workshops will be offered to increase knowledge and improve integrated (physical and mental health services) services.                              | Professionals and physicians trained on integrated care of older adults.                                                                                                                                                         | Completed: 9/30/2008<br>Impact: 90 persons trained        |
| 9/2008-<br>9/2009                                                                                         | (B1-3.b) Increase collaboration and training opportunities among behavioral health, physical health, and aging systems of care. | Workshops will be offered to increase knowledge and improve integrated (physical and mental health services) services.                              | Professionals and physicians trained on integrated care of older adults.                                                                                                                                                         | Completed: 9/1/2009<br>Impact: 50 persons trained         |
| Supporting Entry: Supporting entry A1-1.b contributed to the development of infrastructure change A1-1.d. |                                                                                                                                 |                                                                                                                                                     |                                                                                                                                                                                                                                  |                                                           |
| 10/2007-<br>9/2008                                                                                        | (A1-1.b) Develop and implement actions that restructure how the behavioral healthcare system is financed                        | Administrative regulation with the intent of ensuring proper utilization review of public mental health services.                                   | Administrative regulations on utilization review will be approved and signed by all relevant parties. [Infrastructure change]                                                                                                    | Completed: 9/30/2008<br>Impact: 1 financing policy change |
| 10/2007-<br>9/2008                                                                                        | (A1-1d) Develop and implement actions that restructure how the behavioral healthcare system is financed                         | Infrastructure established for a compliance and utilization review program.                                                                         | Infrastructure for a compliance and utilization review program established as evidenced by new administrative rule created. [Supporting entry: Rule must be signed, as in A1-1.b., above, to count as an infrastructure change.] | Completed: 7/1/2008                                       |

Online Supplement 4: Non-parametric correlations between total number of infrastructure changes addressing a National Outcome Measure (NOMS) area and change in Statewide NOMs outcomes

| Infrastructure Entries     | Change in National Outcome Measures            | $r_s$                               | p(1-tailed)+ |
|----------------------------|------------------------------------------------|-------------------------------------|--------------|
| Addressing                 |                                                |                                     |              |
| Assertive Community Treat. | Proportion receiving ACT                       | -.775                               | ns           |
| Multi-systemic Therapy     | Proportion receiving MST                       | -.866                               | ns           |
| Employment                 | Proportion receiving Supported Employment      | .062                                | ns           |
| Housing                    | Proportion living in private residences        | -.256                               | ns           |
|                            | Proportion living in supported housing         | .593                                | ns           |
|                            | Proportion living in homeless shelter          | .195                                | ns           |
| Hospitalization            | State hospital Utilization Rate                | .068                                | ns           |
| Evidence-based Treat.      | EBP Penetration Rate                           | -.241                               | ns           |
| Criminal Justice Collab.   | Proportion living in jail/corrections          | .254                                | ns           |
| Recovery                   | Community services Utilization Rate            | -.945                               | p<.001**     |
|                            | Proportion receiving Supported Employment      | -.203                               | ns           |
|                            | Proportion living in private residence         | -.030                               | ns           |
|                            | Proportion living in supported housing         | .709                                | ns           |
|                            | Proportion not living in homeless shelter      | -.916                               | p<.001**     |
|                            | Proportion living in jail/corrections          | .468                                | ns           |
|                            | Consumer, family members of statewide networks | Community services Utilization Rate | -.589        |
|                            | State hospital Utilization Rate                | -.236                               | ns           |
|                            | EBP Penetration Rate                           | -.573                               | ns           |
|                            | Proportion receiving ACT                       | -.400                               | ns           |
|                            | Proportion receiving MST                       | .500                                | ns           |
|                            | Proportion receiving Supported Employment      | -.290                               | ns           |
|                            | Proportion living in private residence         | .291                                | ns           |
|                            | Proportion living in supported housing         | .236                                | ns           |
|                            | Proportion living in homeless shelter          | .627                                | ns           |
|                            | Proportion living in jail/corrections          | .570                                | ns           |

\*Significant at p=.009; \*\*Significant at p=.001 level

+Significance levels corrected for alpha inflation using Modified Bonferroni (B-Y FDR), where appropriate.
